# Supplementary material
Source: Springer Nature journal article supplement (https://www.springermedizin.de/resource/supplementary/12998_2010_130_MOESM1_ESM.pdf/9623638)

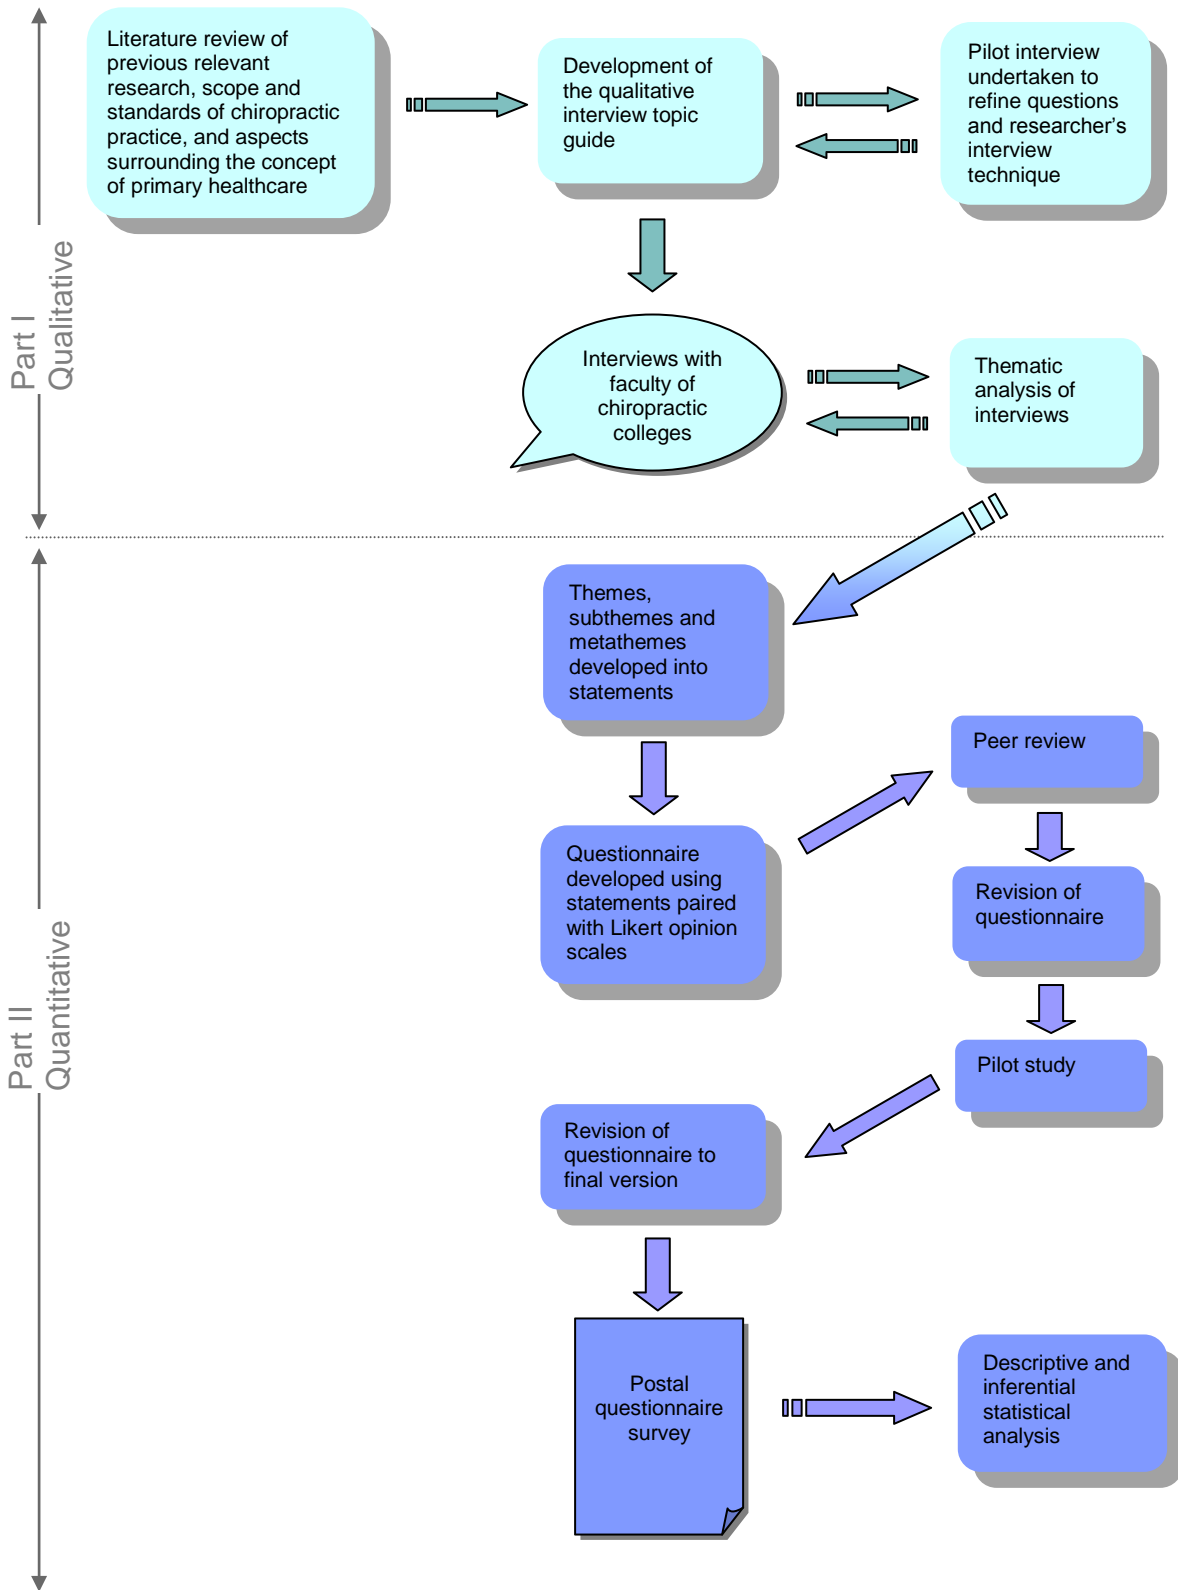

Supplement: MOESM1 [file 9623638]
